# Supplementary material for: Hematology and clinical biochemistry reference intervals for companion pigs using the ADVIA 2120 and Cobas c501
Source: PeerJ. 2025 Feb 12;13:e18968. doi: 10.7717/peerj.18968 (PMC11829631; doi:10.7717/peerj.18968)
Supplement: Supplemental Information 6 [file peerj-13-18968-s006.xlsx]

## Sheet: AdviaCobas
Sample #	Age (yrs)	Sex	Breed	TP-REF	Fibrinogen	WBC	RBC	HGB	HCT	MCV	MCH	MCHC	RDW	PLT	MPV	Plateletcrit	Neutr, Auto (%)	Lymph, Auto (%)	Mono, Auto (%)	Eos, Auto (%)	Baso, Auto (%)	LUC, Auto (%)	Neut-Auto	Lym-Auto	Mon-Auto	Eos-Auto	Baso-Auto	LUC-Auto	Neutr, Man (%)	Band, Man (%)	Lymph, Man (%)	Mono, Man (%)	Eos, Man (%)	Baso, Man (%)	Neut-Man	Band-Man	Lym-Man	Mon-Man	Eos-Man	Baso-Man	nRBC	Retic	AST	BILI	GGT	CK	UREA	CREA	PHOS
1	3	F	Vietnamese potbellied mini pig	6.9	100	10.99	5.29	10.3	30.1	56.9	19.4	34.2	15.8	270	10.3	0.28	43.2	47.7	6.4	0.6	0.1	2.1	4.74768	5.24223	0.70336	0.06594	0.01099	0.23079	51	0	44	3	0	1	5.6049	0	4.8356	0.3297	0	0.1099	0		37	0.09	111	823	16	0.9	4.8
2	3	F	Vietnamese potbellied mini pig	6.5	100	9.92	5.81	10.9	30.3	52.1	18.7	35.9	15.4	351	8	0.28	49.6	45.3	4.2	0.7	0	0.1	4.92032	4.49376	0.41664	0.06944	0	0.00992	43	0	46	9	1	1	4.2656	0	4.5632	0.8928	0.0992	0.0992	0		42	0.09	228	417	20	1.2	4.1
3	4	C	Mix	7.6	100	6.41	5.31	12.2	34.8	65.5	23	35.2	14.4	342	9.9	0.34	53.1	37.6	5.7	2	0.2	1.4	3.40371	2.41016	0.36537	0.1282	0.01282	0.08974	63	0	33	3	1	0	4.0383	0	2.1153	0.1923	0.0641	0	0		26	0.1	52	724	11	1.2	5.2
4	5	C	Vietnamese potbellied mini pig	6.8		6.43	4.91	10.6	29.9	60.8	21.6	35.6	15.1	247	12.6	0.31	49.7	42.3	4	2.1	0.1	1.9	3.19571	2.71989	0.2572	0.13503	0.00643	0.12217	59	0	27	11	3	0	3.7937	0	1.7361	0.7073	0.1929	0	0		31	0.06	65	738	9	1.4	4.6
5	2.5	S	Mix	6.9	0	3.59	5.23	10.9	31.7	60.7	20.9	34.5	14.9	368	11.8	0.44	38.6	51.7	4.5	3.8	0.3	1.1	1.38574	1.85603	0.16155	0.13642	0.01077	0.03949	31	0	63	4	2	0	1.1129	0	2.2617	0.1436	0.0718	0	0		47	0.04	62	491	15	1.2	5.1
6	3	M	Vietnamese potbellied mini pig	7.1	100	14.76	5.34	10.7	30.8	57.7	20	34.7	17.9	413	8.2	0.34	77	19.1	2.5	0.5	0.1	0.8	11.3652	2.81916	0.369	0.0738	0.01476	0.11808	80.5	1.5	11	6	0.5	1	11.8818	0.2214	1.6236	0.8856	0.0738	0.1476	0		23	0.06	42	708	13	1.1	5
7	2	S	Mix	7.4	300	8.44	5.76	11.8	33.5	58.2	20.5	35.2	14.3	240	9.9	0.24	38.4	55.3	3.9	1	0.2	1.2	3.24096	4.66732	0.32916	0.0844	0.01688	0.10128	30	0	65	5	0	0	2.532	0	5.486	0.422	0	0	0		18	0.26	54	857	11	1.6	5.2
8	6	F	Vietnamese potbellied mini pig	7.3	0	10	5.37	11.1	31.8	59.3	20.6	34.8	14.3	354	9.8	0.35	63	31.3	3.1	0.8	0.1	1.6	6.3	3.13	0.31	0.08	0.01	0.16	68	0	30	1	1	0	6.8	0	3	0.1	0.1	0	0		50	0.12	67	536	10	1.4	4.5
9	3.5	C	Vietnamese potbellied mini pig	7.3	0	7.8	4.67	11.2	33.1	70.9	24	33.8	13.5	295	9.4	0.28	61	31.7	3.8	2.1	0.1	1.4	4.758	2.4726	0.2964	0.1638	0.0078	0.1092	71	0	25	3	1	0	5.538	0	1.95	0.234	0.078	0	0		33	0.08	96	919	7	1	5.1
10	2	C	Vietnamese potbellied mini pig	7.3		6.63	5.32	11.2	32.6	61.3	21.1	34.4	15.3	201	9.4	0.19	38.9	47.3	7.8	2.7	0.2	3.1	2.57907	3.13599	0.51714	0.17901	0.01326	0.20553	42	0	41	16	0	1	2.7846	0	2.7183	1.0608	0	0.0663	0		14	0.1	63	331	10	1.2	4.2
11	5	S	Vietnamese potbellied mini pig	7.5		9.8	6.03	13	36.3	60.2	21.5	35.8	15.8	189	16.9	0.32	45.4	48.6	4.2	0.5	0.1	1.3	4.4492	4.7628	0.4116	0.049	0.0098	0.1274	52	0	38	6	2	0	5.096	0	3.724	0.588	0.196	0	0.2		19	0.04	67	505	14	0.9	6.5
12	11	S	Vietnamese potbellied mini pig	7	100	8.64	3.47	8.3	23.9	68.8	23.8	34.6	16.2	299	12	0.36	45.5	46	5.5	1.2	0.1	1.7	3.9312	3.9744	0.4752	0.10368	0.00864	0.14688	55	0	40	1	4	0	4.752	0	3.456	0.0864	0.3456	0	0		33	0.06	72	876	8	1.4	7.1
13	2	C	Vietnamese potbellied mini pig	7.1	300	6.34	5.05	10.8	30.2	59.9	21.4	35.7	14.1	371	8.9	0.33	48.7	42.4	4.4	2.4	0	2	3.08758	2.68816	0.27896	0.15216	0	0.1268	55	0	36	3	4	2	3.487	0	2.2824	0.1902	0.2536	0.1268	0		30	0.11	52	910	8	0.9	3.5
14	6	S	Vietnamese potbellied mini pig	8.5	100	6.4	7.43	17.6	50.6	68.1	23.7	34.7	13.9	321	10.1	0.32	39.4	48.3	4	5.9	0.4	2.1	2.5216	3.0912	0.256	0.3776	0.0256	0.1344	42	2	37	8	10	1	2.688	0.128	2.368	0.512	0.64	0.064	0		28	0.09	53	879	2	1.1	4.6
15	6	S	Vietnamese potbellied mini pig	7.7	300	8.47	4.89	10.3	29.2	59.9	21.2	35.4	15.1	436	9.2	0.4	55	40.2	3.4	0.5	0.1	0.7	4.6585	3.40494	0.28798	0.04235	0.00847	0.05929	53	0	39	7	1	0	4.4891	0	3.3033	0.5929	0.0847	0	0		66	0.12	49	2942	16	1	6.4
16	3	F	Vietnamese potbellied mini pig	8.2	400	5.54	5.81	13.1	37.5	64.6	22.6	35	14.6	287	11	0.31	27.9	64.4	5.7	0.3	0.1	1.5	1.54566	3.56776	0.31578	0.01662	0.00554	0.0831	31	0	59	8	0	2	1.7174	0	3.2686	0.4432	0	0.1108	0		35	0.1	67	915	17	1	6.1
17	1	F	Mix	6.5	0	6.38	5	10	28.5	56.9	20.1	35.3	15.2	413	9.1	0.38	29.6	61.2	4.4	3.3	0.1	1.5	1.88848	3.90456	0.28072	0.21054	0.00638	0.0957	37	0	61	2	0	0	2.3606	0	3.8918	0.1276	0	0	0		55	0.09	40	1149	14	0.9	6.5
18	1	M	Mix																																								58	0.08	102	2390	12	0.9	7.1
19	7	F	Mix	6.8		8.01	3.59	8.5	24.2	67.4	23.6	35	14.8	226	13.3	0.3	26	66.6	4.8	1	0.2	1.4	2.0826	5.33466	0.38448	0.0801	0.01602	0.11214	20	0	78	1	1	0	1.602	0	6.2478	0.0801	0.0801	0	0		73	0.06	67	827	18	0.9	6.6
20	0.5	C	Mix	6.2		10.29	5.48	9.1	26.6	48.4	16.5	34.1	17	478	7.4	0.35	40.1	52.9	2.8	1.5	0.1	2.5	4.12629	5.44341	0.28812	0.15435	0.01029	0.25725	48	0	51	1	0	0	4.9392	0	5.2479	0.1029	0	0	0		32	0.06	46	646	15	1	5.9
21	0.5	C	Mix	6.5		9.22	6.38	10.9	32.9	51.6	17.1	33.1	17.8	558	7.1	0.4	40	50.7	6.2	1.5	1.3	0.3	3.688	4.67454	0.57164	0.1383	0.11986	0.02766	47	0	44	8	1	0	4.3334	0	4.0568	0.7376	0.0922	0	0		30	0.12	66	694	14	0.9	6.5
22	0.5	C	Mix	7	100	8.21	5.94	10.6	30.7	51.8	17.9	34.5	15.6	525	7	0.37	38.5	52.1	5	1.2	1.8	1.5	3.16085	4.27741	0.4105	0.09852	0.14778	0.12315	36	0	58	3	0	3	2.9556	0	4.7618	0.2463	0	0.2463	0.08		33	0.08	39	1020	15	1.1	6.4
23	0.5	C	Mix	6.8		12.15	5.7	10	29.3	51.4	17.5	34	16.7	502	7	0.35	51.4	42.8	3.1	1.3	0.3	1.1	6.2451	5.2002	0.37665	0.15795	0.03645	0.13365	47	0	48	4	2	1	5.7105	0	5.832	0.486	0.243	0.1215	0		43	0.05	39	944	14	0.9	5.9
24	0.5	C	Mix	7.1	100	9.8	6.62	11.8	34.7	52.3	17.8	34	17.4	411	7.3	0.3	28.5	63	4.6	1.1	0.9	1.9	2.793	6.174	0.4508	0.1078	0.0882	0.1862	20	0	75	2	0	1	1.96	0	7.35	0.196	0	0.098	0.2		39	0.13	99	833	13	1	6.3
25	0.5	C	Mix	6.9	0	10.97	6.43	11	32.9	51.1	17.1	33.5	16.9	361	8.4	0.3	32.5	60.4	5	0.6	0.4	1.1	3.56525	6.62588	0.5485	0.06582	0.04388	0.12067	30	0	62	5	3	0	3.291	0	6.8014	0.5485	0.3291	0	0		29	0.03	59	1132	8	0.6	6.8
26	0.5	C	Mix	6.2	0	8.88	7.22	11.8	35	48.5	16.3	33.7	17.6	340	10.3	0.35	41.9	54	2.7	0.1	0.2	1.1	3.72072	4.7952	0.23976	0.00888	0.01776	0.09768	40	0	59	0	0	1	3.552	0	5.2392	0	0	0.0888	0		52	0.08	87	2411	10	2	4.9
27	0.5	C	Mix	7.2	500	14.81	6.62	11.7	34.6	52.2	17.7	33.8	16.6	449	9.7	0.43	51.8	43.1	3.1	0.7	0.3	0.9	7.67158	6.38311	0.45911	0.10367	0.04443	0.13329	52	0	45	3	0	0	7.7012	0	6.6645	0.4443	0	0	0		20	0.09	52	726	9	1.7	5.8
28	0.5	C	Mix	7.2	400	13.5	6.6	10.6	32.4	49	16.1	32.9	17.1	510	7.6	0.39	35	58.6	5.1	0.6	0.4	0.3	4.725	7.911	0.6885	0.081	0.054	0.0405	30	0	65	5	0	0	4.05	0	8.775	0.675	0	0	0		51	0.04	94	2407	6	0.8	6
29	0.5	C	Mix	7	200	9.12	5.98	10.3	30.7	51.3	17.3	33.7	16.8	464	7.6	0.35	49.8	45.2	3.3	0.4	0.2	1.1	4.54176	4.12224	0.30096	0.03648	0.01824	0.10032	48	0	45	5	2	0	4.3776	0	4.104	0.456	0.1824	0	0		40	0.07	68	944	6	1.3	5.9
30	0.5	S	Mix	5.5	100	9.81	4.87	9.3	27.3	56.1	19.1	34.1	15.7	435	7.4	0.32	47.7	45.7	4.2	0.9	0.1	1.4	4.67937	4.48317	0.41202	0.08829	0.00981	0.13734	52	0	46	2	0	0	5.1012	0	4.5126	0.1962	0	0	0		47	0.05	55	1471	7	0.9	5.2
31	7	C	Vietnamese potbellied mini pig	7.6	100	5.46	4.95	11.2	33.8	68.3	22.6	33.1	14	363	9.5	0.34	47.6	44.3	3.4	2.1	0.1	2.5	2.59896	2.41878	0.18564	0.11466	0.00546	0.1365	44	0	48	3	3	2	2.4024	0	2.6208	0.1638	0.1638	0.1092	0		20	0.09	43	704	11	1	5.3
32	3	C	Vietnamese potbellied mini pig	6.9	100	6.39	5.57	12.2	35.3	63.4	21.9	34.6	13.4	262	10	0.26	33.5	51.4	7.4	4	0.3	3.4	2.14065	3.28446	0.47286	0.2556	0.01917	0.21726	36	0	54	6	3	1	2.3004	0	3.4506	0.3834	0.1917	0.0639	0		55	0.32	87	1796	8	1.4	4.9
33	0.6	M	Mix	6.9	100	11.13	5.99	12	34.7	57.9	20.1	34.7	14.9	374	8.1	0.3	47.7	44.2	5.1	1	0.3	1.7	5.30901	4.91946	0.56763	0.1113	0.03339	0.18921	48	0	45	7	0	0	5.3424	0	5.0085	0.7791	0	0	0		25	0.04	42	1032	14	1.3	5.1
34	0.6	M	Mix	6.5	0	9.98	6.56	12.3	35.2	53.7	18.8	35	15.5	334	8.9	0.3	50.7	41.5	5.9	1.1	0.1	0.7	5.05986	4.1417	0.58882	0.10978	0.00998	0.06986	48	2	43	6	0	1	4.7904	0.1996	4.2914	0.5988	0	0.0998	0		47	0.12	104	2156	12	1.3	6
35	1	M	Vietnamese potbellied mini pig	7.9	600	12.86	4.05	8.7	25.4	62.5	21.6	34.5	15.8	466	10	0.47	58.1	31.4	8.6	1.3	0.1	0.6	7.47166	4.03804	1.10596	0.16718	0.01286	0.07716	65	0	30	4	1	0	8.359	0	3.858	0.5144	0.1286	0	0		20	0.14	67	248	9	1.1	5.3
36	1	F	Mix	6.6	100	8.27	4.57	9.6	28.8	63.1	21.1	33.4	16.2	339	8	0.27	33.4	49.9	10.1	3.4	0.1	3.1	2.76218	4.12673	0.83527	0.28118	0.00827	0.25637	36	0	48	12	4	0	2.9772	0	3.9696	0.9924	0.3308	0	0		21	0.15	65	684	6	1.6	4.9
37	2	M	Mix	7.8	200	5.06	6.08	12.7	36.4	59.9	20.9	34.8	13.6	375	8.2	0.31	30.5	60	5.6	1.7	0.1	2	1.5433	3.036	0.28336	0.08602	0.00506	0.1012	34	0	57	4	1	4	1.7204	0	2.8842	0.2024	0.0506	0.2024	0		20	0.04	92	495	15	0.9	4.4
38	1	M	Mix	6.6	200	9.38	6.09	11.9	33.6	55.2	19.5	35.3	16.4	395	6.5	0.26	50.9	45.1	1.8	1.9	0.2	0.2	4.77442	4.23038	0.16884	0.17822	0.01876	0.01876	40	0	57	1	1	1	3.752	0	5.3466	0.0938	0.0938	0.0938	0		36	0.1	136	885	14	1.3	6.2
39	2	C	Vietnamese potbellied mini pig	7.8	300	28.71	5.36	10.7	29.9	55.7	19.9	35.7	15.5	470	10	0.47	75.4	18.8	2.1	2.1	0.1	1.4	21.65	5.39748	0.60291	0.60291	0.02871	0.40194	82	0	13	2	3	0	23.54	0	3.7323	0.5742	0.8613	0	0		30	0.08	75	579	11	0.8	5
40	2	M	Vietnamese potbellied mini pig	7.8	300	23.87	5.02	10.9	31.6	63	21.6	34.4	14.4	440	8.7	0.38	76.2	20.1	1.9	0.8	0.1	0.9	18.19	4.79787	0.45353	0.19096	0.02387	0.21483	78	0	15	6	0	1	18.62	0	3.5805	1.43	0	0.2387	0		30	0.09	82	809	10	0.7	5.4
41	3	M	Vietnamese potbellied mini pig	7.1	100	10.02	4.09	9.7	26.9	65.8	23.7	35.9	15.2	147	16.4	0.24	62.8	32.8	2.2	1.2	0.2	0.8	6.29256	3.28656	0.22044	0.12024	0.02004	0.08016	66	0	28	3	2	1	6.6132	0	2.8056	0.3006	0.2004	0.1002	0		27	0.06	58	249	15	1.1	4.7
42	2	S	Vietnamese potbellied mini pig	7	100	6.39	5.95	12.1	34.6	58.2	20.3	35	15.9	239	9.2	0.22	29.5	60.8	4.5	4.7	0	0.4	1.88505	3.88512	0.28755	0.30033	0	0.02556	24	0	72	1	3	0	1.5336	0	4.6008	0.0639	0.1917	0	0		21	0.23	59	430	7	1.1	5
43	3	F	Vietnamese potbellied mini pig	7.2	300	12.04	4.58	10.1	28.6	62.6	22.1	35.4	15.3	334	10.6	0.35	41.2	38.7	6.3	11.6	0.1	2.1	4.96048	4.65948	0.75852	1.39664	0.01204	0.25284	39	0	39	5	11	6	4.6956	0	4.6956	0.602	1.3244	0.72	0		27	0.05	143	386	9	1.2	5.2
44	2	F	Vietnamese potbellied mini pig	7.4	400	12.82	4.03	9.2	26	64.7	22.9	35.4	15.5	249	12.6	0.31	52.7	35.6	4.8	3.4	0.1	3.3	6.75614	4.56392	0.61536	0.43588	0.01282	0.42306	67	1	24	4	3	1	8.5894	0.1282	3.0768	0.5128	0.3846	0.1282	0		27	0.09	50	962	16	1.3	8.1
45	5	F	Vietnamese potbellied mini pig	8.4	200	10.63	7.33	15.3	44.8	61.1	20.8	34.1	13.6	392	8	0.31	35.6	41.7	6.8	15.5	0.2	0.2	3.78428	4.43271	0.72284	1.64765	0.02126	0.02126	40	0	34	7	18	1	4.252	0	3.6142	0.7441	1.9134	0.1063	0		130	0.07	54	4287	2	0.8	4
46	9	F	Vietnamese potbellied mini pig	8	300	10.55	4.51	10.4	31.1	69.1	23.1	33.4	13.7	234	13.1	0.31	73.5	19.2	3.3	3	0.1	0.9	7.75425	2.0256	0.34815	0.3165	0.01055	0.09495	84	0	12	3	1	0	8.862	0	1.266	0.3165	0.1055	0	0		24	0.07	62	762	7	0.8	7.2
47	1	M	Vietnamese potbellied mini pig	7.3	300	9.59	4.61	10.2	29	63	22	35	15.4	339	11.6	0.39	53.2	38	4.9	1.7	0.2	2.1	5.10188	3.6442	0.46991	0.16303	0.01918	0.20139	52	0	38	6	2	0	4.9868	0	3.6442	0.5754	0.1918	0	0		32	0.07	45	1249	17	1.4	6.8
48	0.4	F	Mix	6.8	700	6.85	6.07	11.4	33.7	55.5	18.7	33.8	15.2	241	9.8	0.24	28.1	63.3	3.8	1.9	0.2	2.6	1.92485	4.33605	0.2603	0.13015	0.0137	0.1781	24	0	72	3	1	0	1.644	0	4.932	0.2055	0.0685	0	0		26	0.04	90	455	9	0.8	5.1
49	0.4	F	Mix	5.8	400	8.92	4.69	9.4	27.2	58.1	20	34.5	14.5	314	8.3	0.26	12	75.8	3.8	5.1	0.2	3.1	1.0704	6.76136	0.33896	0.45492	0.01784	0.27652	9	0	84	3	3	1	0.8028	0	7.4928	0.2676	0.2676	0.0892	0		33	0.12	87	737	13	1.4	6.1
50	3	F	Mix			8.06	5.39	10.9	32.8	60.9	20.2	33.1	17	343	9.3	0.32	24.5	62.1	4	4.7	0.3	4.4	1.9747	5.00526	0.3224	0.37882	0.02418	0.35464	9	0	79	3	6	3	0.7254	0	6.3674	0.2418	0.4836	0.2418	0		43	0.07	81	957	16	1.3	7.3
51	3	C	Vietnamese potbellied mini pig	7.4	300	10.09	4.33	9.7	27.1	62.6	22.3	35.6	14.1	278	16.6	0.46	43.7	47.4	3.7	3	0.1	2	4.40933	4.78266	0.37333	0.3027	0.01009	0.2018	56	0	35	1	3	5	5.6504	0	3.5315	0.1009	0.3027	0.5045	0		35	0.05	71	2793	9	1.3	7.1
52	4	S	Vietnamese potbellied mini pig																																								18	0.12	68	255	6	1.1	4.8
53	2	C	Vietnamese potbellied mini pig	8.5	500	5.64	8.16	16.3	50.9	62.4	20	32	16.3	372	7.5	0.28	32.3	57.8	5.1	3	0.5	1.3	1.82172	3.25992	0.28764	0.1692	0.0282	0.07332	38	0	52	7	0	0	2.1432	0	2.9328	0.3948	0	0	0.17		41	0.13	45	782	9	1.5	5.4
54	2	C	Vietnamese potbellied mini pig	7.6	100	12.75	6.88	13.2	37.2	54	19.2	35.5	16	545	7.5	0.41	45.7	44.4	7.1	0.6	0.3	1.9	5.82675	5.661	0.90525	0.0765	0.03825	0.24225	49	0	44	5	1	1	6.2475	0	5.61	0.6375	0.1275	0.1275	0.13		33	0.06	99	333	11	1	4.5
55	2	M	Vietnamese potbellied mini pig	6.5	100	11.53	3.67	8.4	24.2	65.8	22.9	34.8	15.3	432	7.6	0.33	58.3	31.5	5.2	4.1	0.2	0.7	6.72199	3.63195	0.59956	0.47273	0.02306	0.08071	54	1	33	6	6	0	6.2262	0.1153	3.8049	0.6918	0.6918	0	0		25	0.08	45	841	12	1.3	4.5
56	5	C	Vietnamese potbellied mini pig	7.4	100	7.71	5.35	12.4	34.8	65.1	23.2	35.6	15.5	264	9.9	0.26	48.2	41.9	2.9	4.4	0.3	2.3	3.71622	3.23049	0.22359	0.33924	0.02313	0.17733	53	0	36	8	3	0	4.0863	0	2.7756	0.6168	0.2313	0	0		50	0.15	40	2411	12	1.6	5.1
57	3	C	Vietnamese potbellied mini pig	7.3	300	3.49	5.1	10.5	30.2	59.2	20.5	34.6	16.3	286	9.9	0.28	42.8	46.9	4.1	2.8	0.3	3	1.49372	1.63681	0.14309	0.09772	0.01047	0.1047	42	0	50	6	2	0	1.4658	0	1.745	0.2094	0.0698	0	0		14	0.09	68	255	16	0.9	6.7
58	0.7	F	Mix	6.6	200	7.05	6.39	11.4	33	51.7	17.8	34.4	17.5	491	8.2	0.4	42.3	45.5	5.1	4.9	0.2	1.9	2.98215	3.20775	0.35955	0.34545	0.0141	0.13395	34	0	56	5	3	2	2.397	0	3.948	0.3525	0.2115	0.141	0		17	0.14	57	282	10	1.2	5.3
59	3	C	Vietnamese potbellied mini pig	7.2	0	10.21	4.98	10.8	32	64.4	21.7	33.6	14.7	307	9.2	0.28	54.2	39.3	3.2	2.1	0.1	1.1	5.53382	4.01253	0.32672	0.21441	0.01021	0.11231	67	0	23	8	2	0	6.8407	0	2.3483	0.8168	0.2042	0	0		21	0.11	56	478	12	1	4.9
60	2	F	Mix	7.5	100	7.57	5.45	9.9	29.1	53.5	18.2	34	17.3	441	10	0.44	28.3	58.6	4	6.7	0.3	2.1	2.14231	4.43602	0.3028	0.50719	0.02271	0.15897	36	0	56	6	2	0	2.7252	0	4.2392	0.4542	0.1514	0	0		20	0.14	62	511	9	2.2	4.2
61	2	F	Mix	9	100	8.52	6.03	13.1	38.5	64	21.7	33.9	16.2	311	10.1	0.31	56.5	38.1	3.4	0.5	0.5	1	4.8138	3.24612	0.28968	0.0426	0.0426	0.0852	55	0	32	10	2	1	4.686	0	2.7264	0.852	0.1704	0.0852	0		35	0.2	60	845	11	1.1	4.5
62	1	F	Vietnamese potbellied mini pig	6.5	100	11.3	4.7	8.9	26.2	55.7	18.9	33.9	18.4	406	10	0.4	60.7	27.2	5.7	5.6	0.3	0.6	6.8591	3.0736	0.6441	0.6328	0.0339	0.0678	64	1	29	3	2	1	7.232	0.113	3.277	0.339	0.226	0.113	0		17	0.15	50	260	6	0.8	6.6
63	2	F	American Mini Pig	7.2	100	8.18	6.45	12.4	36.1	55.9	19.2	34.3	16.1	510	7.5	0.38	21.2	66.6	5	2.8	0.4	4.1	1.73416	5.44788	0.409	0.22904	0.03272	0.33538	23	0	65	9	2	1	1.8814	0	5.317	0.7362	0.1636	0.0818	0		26	0.09	58	423	8	0.9	4.8
64	0.75	M	Mix	6.6	300	18.21	5.27	9.2	27.9	53	17.6	33.1	18.6	925	7.2	0.67	57.1	33.9	4.4	2	0.3	2.3	10.3979	6.17319	0.80124	0.3642	0.05463	0.41883	60	0	35	3	2	0	10.926	0	6.3735	0.5463	0.3642	0	0		74	0.09	*874	540	7	0.8	6.7
65	0.75	M	Vietnamese potbellied mini pig	7.5	100	9.19	5.44	10	29	53.3	18.4	34.5	18.5	570	8.1	0.46	46.3	44.3	4.5	3.4	0.2	1.4	4.25497	4.07117	0.41355	0.31246	0.01838	0.12866	50	1	34	9	4	2	4.595	0.0919	3.1246	0.8271	0.3676	0.1838	0		36	0.08	108	964	10	1	6
66	0.75	M	Vietnamese potbellied mini pig	6.6	200	14.08	4.78	8.6	26.2	54.9	18	32.8	18	595	7.3	0.43	51	40.5	5.1	1.5	0.4	1.6	7.1808	5.7024	0.71808	0.2112	0.05632	0.22528	64	0	24	8	3	1	9.0112	0	3.3792	1.1264	0.4224	0.1408	0		104	0.07	*443	491	3	0.6	6.1
67	0.75	M	Vietnamese potbellied mini pig	6.4	400	18.46	4.43	8.1	23.7	53.6	18.3	34.2	18	508	7.5	0.38	64.9	27.6	4.7	1.7	0.1	1	11.9805	5.09496	0.86762	0.31382	0.01846	0.1846	72	0	16	9	3	0	13.2912	0	2.9536	1.6614	0.5538	0	0		38	0.14	83	380	10	0.9	5.6
68	7	F	Mix	7.3		10.83	4.38	8.7	26.8	61.2	20	32.6	16.4	248	9.3	0.23	59.2	35.3	2.5	1.6	0.1	1.2	6.41136	3.82299	0.27075	0.17328	0.01083	0.12996	60	0	32	5	2	1	6.498	0	3.4656	0.5415	0.2166	0.1083	0		32	0.11	36	607	12	1.9	4.2
69	4	F	Mix	7.7		6.31	2.91	7.7	24	82.7	26.7	32.2	30.8	358	11	0.39	17.5	70.2	8.4	2.6	0.4	1	1.10425	4.42962	0.53004	0.16406	0.02524	0.0631	14	0	69	9	5	3	0.8834	0	4.3539	0.5679	0.3155	0.1893	0		29	0.13	53	418	10	0.9	4.4
70	0.5	F	American Mini Pig	5.4		14.93	5.89	10.7	29.9	50.7	18.2	35.9	18.1	260	7.9	0.21	20.9	69.1	3.8	3.3	0.3	2.5	3.12037	10.3166	0.56734	0.49269	0.04479	0.37325	16	0	73	8	3	0	2.3888	0	10.8989	1.1944	0.4479	0	0		21	0.04	45	454	8	0.4	6.9
71	0.5	F	American Mini Pig	6		13.08	6.88	11.5	33.3	48.3	16.7	34.5	19	317	7.9	0.25	42	49.5	3.7	2.6	0.5	1.6	5.4936	6.4746	0.48396	0.34008	0.0654	0.20928	30	0	59	7	2	2	3.924	0	7.7172	0.9156	0.2616	0.2616	0		22	0.05	57	621	10	0.7	7.4
72	3	F	American Mini Pig	6.7		6.67	5.16	10.4	29.2	56.6	20.1	35.6	16.7	354	8.6	0.3	24.3	69.3	2.4	2.9	0.3	0.8	1.62081	4.62231	0.16008	0.19343	0.02001	0.05336	26	0	65	2	4	3	1.7342	0	4.3355	0.1334	0.2668	0.2001	0		30	0.07	62	4953	9	0.8	4.1
73	0.8	F	American Mini Pig	5.6		7.27	5.91	11.2	31.3	52.9	19	35.9	15.7	350	8.2	0.29	28.1	63.2	5.4	2.5	0.2	0.6	2.04287	4.59464	0.39258	0.18175	0.01454	0.04362	18	0	73	5	2	2	1.3086	0	5.3071	0.3635	0.1454	0.1454	0	99.9	29	0.05	46	974	11	1	5
74	1.5	F	American Mini Pig	6.1		7.37	4.95	9.2	25.6	51.7	18.5	35.8	18.1	464	7.1	0.33	27.4	63	4.4	3.6	0.3	1.5	2.01938	4.6431	0.32428	0.26532	0.02211	0.11055	31	0	64	4	1	0	2.2847	0	4.7168	0.2948	0.0737	0	0	77.8	71	0.04	33	1500	11	0.6	6.6
75	3	F	Mix	6.9		15.32	4.02	9.1	25.7	64	22.8	35.6	16.7	178	13	0.23	41.5	40.2	4.2	13.6	0.3	0.3	6.3578	6.15864	0.64344	2.08352	0.04596	0.04596	39	1	39	4	16	1	5.9748	0.1532	5.9748	0.6128	2.4512	0.1532	0	50.4	20	0.16	48	318	8	0.8	4.2
76	2.5	F	Meishan Pig	7.2		10.04	4.01	9.4	26.3	65.6	23.4	35.6	15.5	403	8	0.32	50.5	36.5	6.5	2.9	1.7	1.9	5.0702	3.6646	0.6526	0.29116	0.17068	0.19076	54	0	34	8	3	1	5.4216	0	3.4136	0.8032	0.3012	0.1004	rare	23.8	11	0.08	57	199	11	1.3	5.3
77	1	F	Mix	6.4		11.72	4.65	8.6	25.4	54.6	18.6	34	16.2	357	9.2	0.33	27	65.1	2.9	2.6	0.5	1.9	3.1644	7.62972	0.33988	0.30472	0.0586	0.22268	31	0	61	5	3	0	3.6332	0	7.1492	0.586	0.3516	0	0		19	0.15	68	285	10	1.6	6.4
78	6	F	Mix	7.7		8.9	5.08	10.6	30	59	20.9	35.4	16.3	160	11.7	0.19	53.1	41.2	2.9	1	0.6	1.1	4.7259	3.6668	0.2581	0.089	0.0534	0.0979	55	0	33	7	3	2	4.895	0	2.937	0.623	0.267	0.178	0	34.8	*285	0.36	27	*6999	11	1.8	4.6
79	4	F	American Mini Pig	8.3		11.49	4.23	10.1	28.6	67.6	23.8	35.1	16.2	221	11.9	0.26	60.8	33.6	2.7	0.6	0.1	2.2	6.98592	3.86064	0.31023	0.06894	0.01149	0.25278	65	0	25	9	0	1	7.4685	0	2.8725	1.0341	0	0.1149	0	20.2	30	0.17	57	619	8	1	4.6
80	5	F	Mix	7.4		7.87	2.25	6.1	17.3	77	27.2	35.4	24.3	196	14.2	0.28	35	55.1	3	1.4	0.1	5.4	2.7545	4.33637	0.2361	0.11018	0.00787	0.42498	37	0	44	13	0	5	2.9119	0	3.4628	1.0231	0	0.3935	0.0787	18.7	27	0.19	38	618	6	1.2	4.3
81	6	F	American Mini Pig	5.8		5.43	4.67	10.2	28.8	61.6	21.8	35.4	14.1	209	13	0.27	40.3	51.7	5.1	2.3	0.2	0.4	2.18829	2.80731	0.27693	0.12489	0.01086	0.02172	60	0	36	2	2	0	3.258	0	1.9548	0.1086	0.1086	0	0	23.7	13	0.34	37	229	6	1	4.8
82	5	F	Mix	7.5		3.74	3.95	9.4	27.5	69.6	23.9	34.4	21.5	*14	9.9	*0.01	28	61.2	4	1.6	0.2	5	1.0472	2.28888	0.1496	0.05984	0.00748	0.187	30	0	60	8	1	1	1.122	0	2.244	0.2992	0.0374	0.0374	0		13	0.22	39	173	5	0.8	4.6
83	3	F	Vietnamese potbellied mini pig	7.9	200	7.55	3.42	8.3	23.3	68.2	24.2	35.5	14.7	345	10.8	0.37	23.6	69.7	5.8	0.3	0.3	0.4	1.7818	5.26235	0.4379	0.02265	0.02265	0.0302	29	0	68	2	0	1	2.1895	0	5.134	0.151	0	0.0755	0	38.9	15	0.12	87	245	5	1.1	5
84	5	F	Vietnamese potbellied mini pig	6.9	0	4.63	4.15	9	25.7	62	21.6	34.9	14.5	271	9.9	0.27	25.2	67.3	3	3.1	0	1.4	1.16676	3.11599	0.1389	0.14353	0	0.06482	32	0	59	3	5	1	1.4816	0	2.7317	0.1389	0.2315	0.0463	0	61.3	18	0.42	38	365	6	1.6	5.2
85	5	F	Vietnamese potbellied mini pig	5.6	100	6.68	5.38	10.9	31.1	57.8	20.2	34.9	16.2	343	8.9	0.3	44.8	48.1	1.5	3.8	0.1	1.6	2.99264	3.21308	0.1002	0.25384	0.00668	0.10688	57	0	35	0	5	1	3.8076	0	2.338	0	0.334	0.0668	0	23.9	20	0.2	49	995	6	2	4.3
86	0.5	F	American Mini Pig	6.1		8.75	5.14	9.6	26.1	50.7	18.7	36.9	15.9	254	11.5	0.29	33.6	57.3	3.2	2.7	0.2	3	2.94	5.01375	0.28	0.23625	0.0175	0.2625	41	0	51	4	3	1	3.5875	0	4.4625	0.35	0.2625	0.0875	0	54	70	0.1	58	1813	13	0.8	6.3
87	0.9	F	American Mini Pig	6.6	100	7.11	4.81	9.9	28.3	58.8	20.5	34.9	16.9	446	10.1	0.45	37.5	56.8	2.7	1.6	0.1	1.3	2.66625	4.03848	0.19197	0.11376	0.00711	0.09243	37	0	57	3	3	0	2.6307	0	4.0527	0.2133	0.2133	0	0	38.2	20	0.26	44	491	7	1	5.5
88	1	F	American Mini Pig	5.9	0	7.92	4.23	8.2	23.1	54.6	19.4	35.6	16.1	386	8	0.31	37.6	55.1	5.5	0.9	0.2	0.7	2.97792	4.36392	0.4356	0.07128	0.01584	0.05544	49	0	42	7	1	1	3.8808	0	3.3264	0.5544	0.0792	0.0792	0	44.5	18	0.19	45	355	5	1.1	5
89	1	F	American Mini Pig	6.2	200	9.92	4.28	9.3	26.5	62	21.7	34.9	16.3	423	9.8	0.41	46.5	46.6	3.2	2.1	0.2	1.3	4.6128	4.62272	0.31744	0.20832	0.01984	0.12896	40	0	49	8	3	0	3.968	0	4.8608	0.7936	0.2976	0	0	52.4	29	0.15	61	877	5	1.1	5
90	0.6	F	Mix	5.3	0	9.94	5.16	9.3	28	54.2	18.1	33.4	17.6	419	9.2	0.39	40.5	53.6	2.9	1.5	0.5	1	4.0257	5.32784	0.28826	0.1491	0.0497	0.0994	33	0	55	9	2	1	3.2802	0	5.467	0.8946	0.1988	0.0994	0	50.6	16	0.12	40	410	6	1.3	7.7
91	7	F	Vietnamese potbellied mini pig	7.8	0	7.2	5.19	11.6	33.3	64.2	22.4	34.8	17.1	314	10.9	0.34	29.5	62.5	4.2	1.3	0.2	2.3	2.124	4.5	0.3024	0.0936	0.0144	0.1656	30	0	65	5	0	0	2.16	0	4.68	0.36	0	0	0	50	20	0.2	74	271	9	1.5	4.2
92	6	F	American Mini Pig	7.5	200	10.6	7.01	15.5	50	71.4	22.1	30.9	17	242	12.2	0.29	51	42.4	3.8	2	0.3	0.5	5.406	4.4944	0.4028	0.212	0.0318	0.053	51	0	47	2	0	0	5.406	0	4.982	0.212	0	0	0	131.4	32	0.09	64	1151	11	2.3	12.3
93	6	F	Mix	7.4	100	7.12	3.99	9.3	27.3	68.6	23.4	34.2	15.6	289	10.8	0.31	40.9	53.7	2.6	1	0.3	1.5	2.91208	3.82344	0.18512	0.0712	0.02136	0.1068	50	0	45	4	1	0	3.56	0	3.204	0.2848	0.0712	0	0	58.7	24	0.12	42	409	10	2.5	5.6
94	2	F	Mix	7.8	400	3.29	5.14	10.3	30.1	58.6	20	34.1	17.4	282	11.9	0.34	21.3	70.1	3.9	1.5	0.3	2.8	0.70077	2.30629	0.12831	0.04935	0.00987	0.09212	27	0	63	4	2	3	0.8883	0	2.0727	0.1316	0.0658	0.0987	0.03	51.7	*189	0.25	70	error	15	1.5	7.5
[truncated: 18 more columns]
